# Supplementary material
Source: PubMed Central journal article supplement (PMC4729602)
Supplement: NIHMS744600-supplement-Legacy_Supplemental_File.pdf [file NIHMS744600-supplement-Legacy_Supplemental_File.pdf]

# Acknowledgment Permission Form

**Journal** *Stroke*

**Manuscript No.** *STROKE/2015/011057*

**First author** Jinhao Lyu

**Title of work** Arterial Spin Labeling MRI Estimation of Antegrade and Collateral Flow in Unilateral Middle Cerebral Artery Stenosis

## **Acknowledgment Permission:**

Dear Editors:

I have read and approved the mention of my name in the Acknowledgment section of the paper entitled "Arterial Spin Labeling MRI Estimation of Antegrade and Collateral Flow in Unilateral Middle Cerebral Artery Stenosis". Thank you very much!

Printed Name: Linfeng Zhang

Signature:

A handwritten signature in black ink that reads "Linfeng Zhang". The signature is written in a cursive style with a large, looped 'Z' at the end.

Date: 11/22/2015
